# Supplementary material for: Facile preparation of fluorescent carbon dots from water caltrop shells and their application in amikacin sensing
Source: Royal Society of Chemistry journal article supplement (doi:10.1039/d5ra00501a), 2025-01-01
Supplement: d5ra00501a7.pdf [file d5ra00501a7.pdf]

Support information:

## **Facile Preparation of Fluorescent Carbon Dots from Water Caltrop Shells and Their Application in Amikacin Sensing**

Yi Zhang<sup>a,1</sup>, Ping Dong<sup>a,1</sup>, Xin Chen<sup>a,1</sup>, Jin Wang<sup>a</sup>, Yun Zhang<sup>a,\*</sup> and Bowen Liu<sup>a,\*</sup>

*a School of Medical Technology, Xinxiang Medical University, Henan Xinxiang 453003, P.R. China.*

\*Corresponding authors:

E-mail: liubowen309@163.com (B.W.Liu) Tel./Fax: +86 373 3029977.

E-mail: zhangyun@xxmu.edu.cn (Y.Zhang) Tel./Fax: +86 373 3029977.

<sup>1</sup> The first three authors contribute equally.

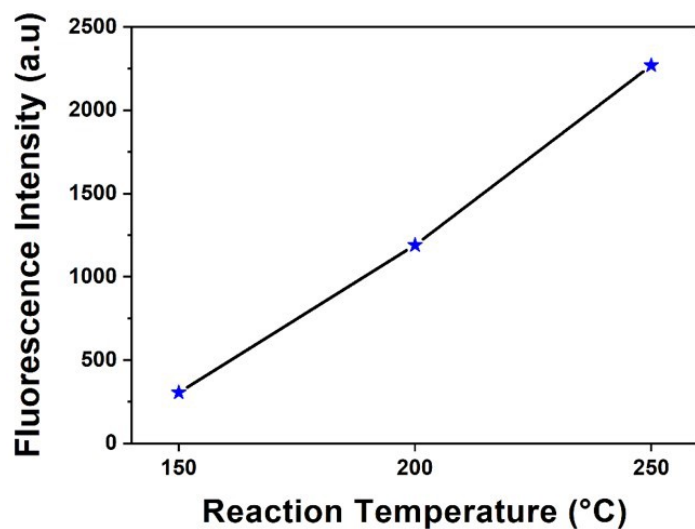

Figure S1. Effect of reaction temperature on the fluorescence intensity of WCS-CDs.

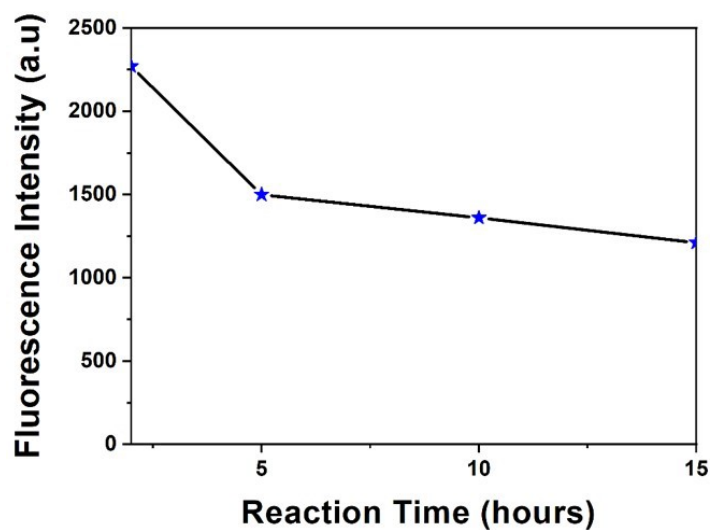

Figure S2. Influence of reaction time on the fluorescence intensity of WCS-CDs.

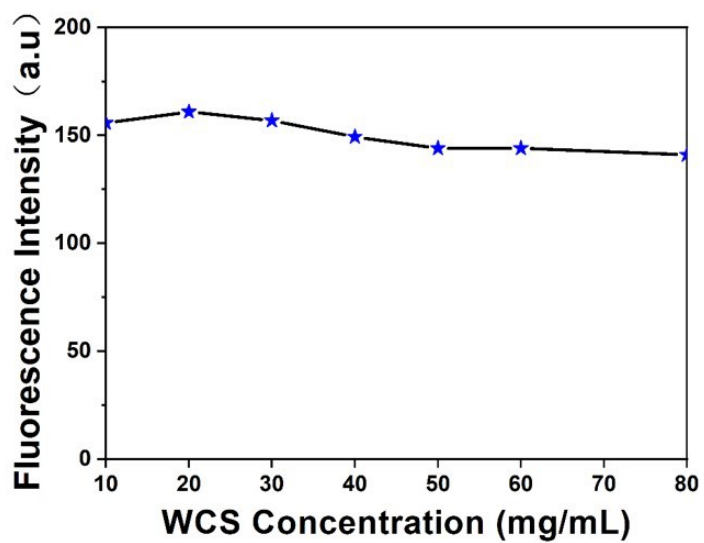

Figure S3. Fluorescence intensity of WCS-CDs at various concentrations of water caltrop shells.

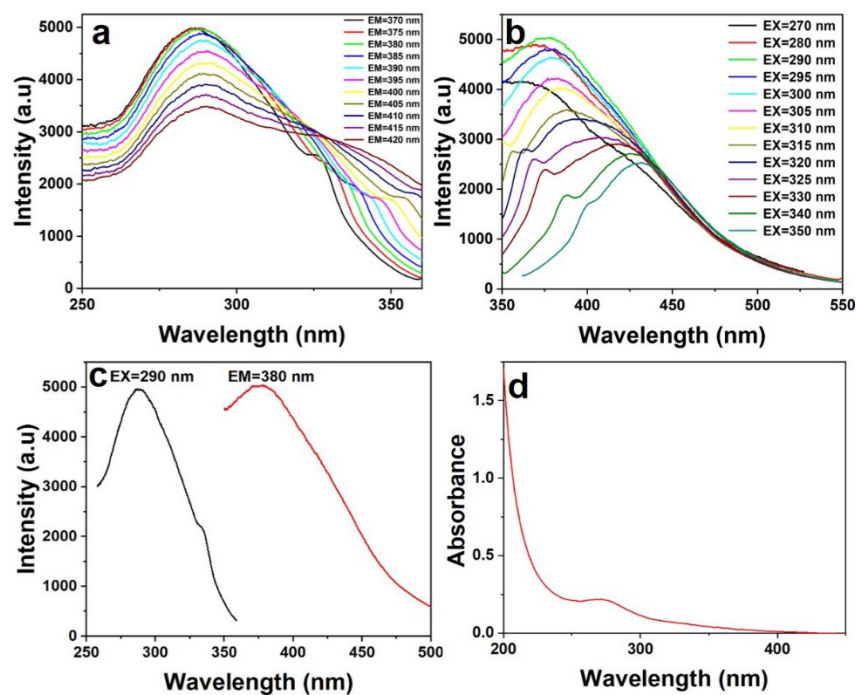

Figure S4. (a) The fluorescence spectra of WCS-CDs at different emission wavelengths; (b) The fluorescence spectra of WCS-CDs at different excitation wavelengths; (c) The optimum excitation and emission wavelength of WCS-CDs; (d) The ultraviolet absorption spectrum of WCS-CDs.

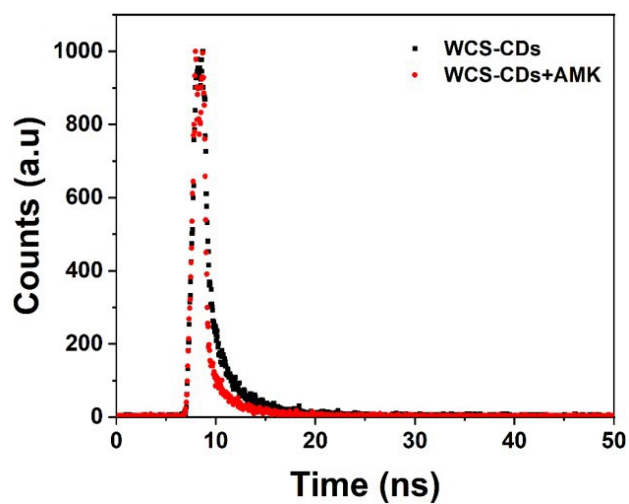

Figure S5. The fluorescence decay curve of aqueous WCS-CDs.
