# Supplementary figures and images for: Facile preparation of fluorescent carbon dots from water caltrop shells and their application in amikacin sensing
Source: Royal Society of Chemistry journal article supplement (doi:10.1039/d5ra00501a), 2025-01-01

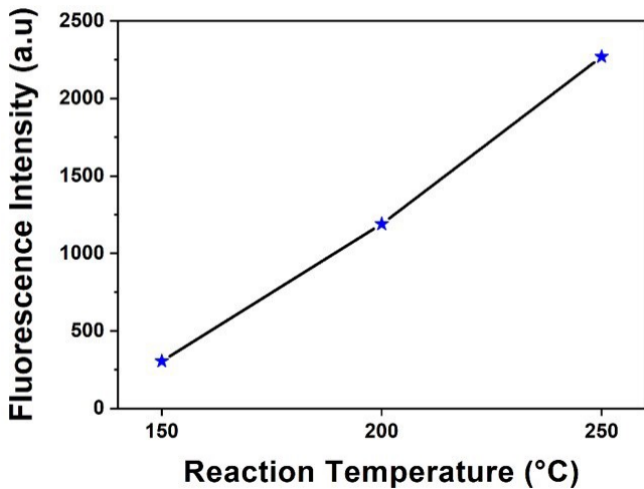

Supplement: d5ra00501a2.pdf [file d5ra00501a2.pdf]

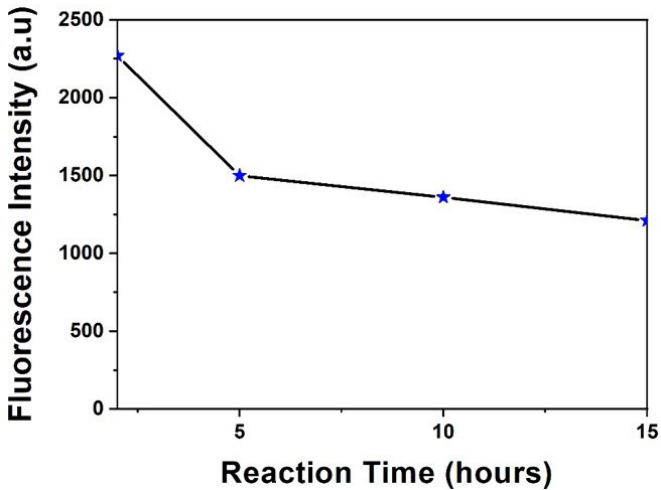

Supplement: d5ra00501a3.pdf [file d5ra00501a3.pdf]

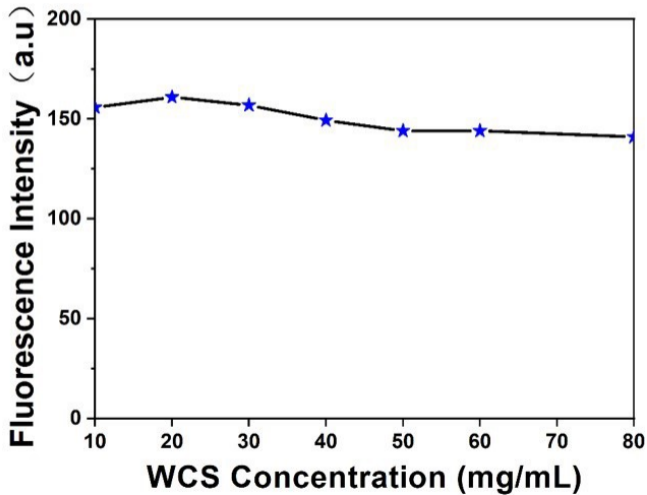

Supplement: d5ra00501a4.pdf [file d5ra00501a4.pdf]

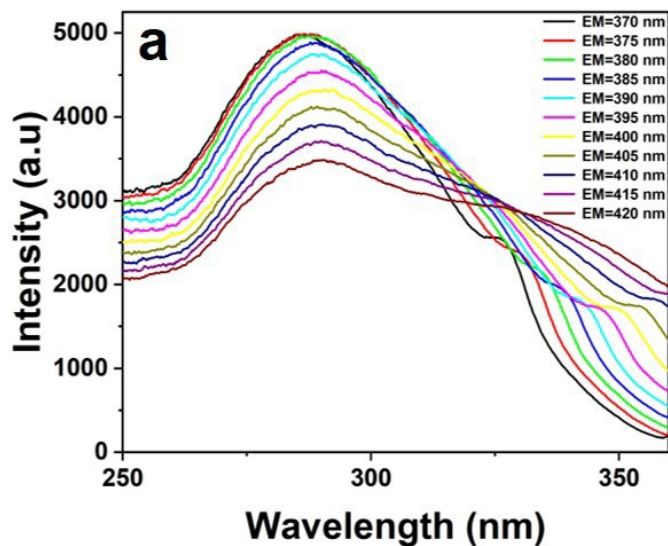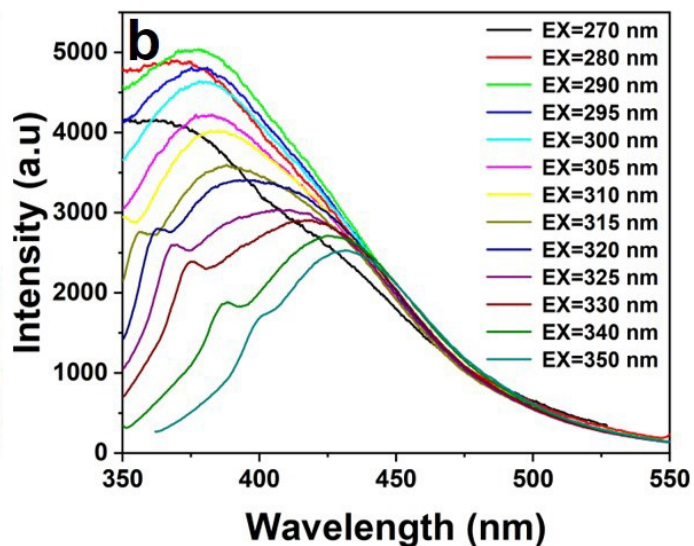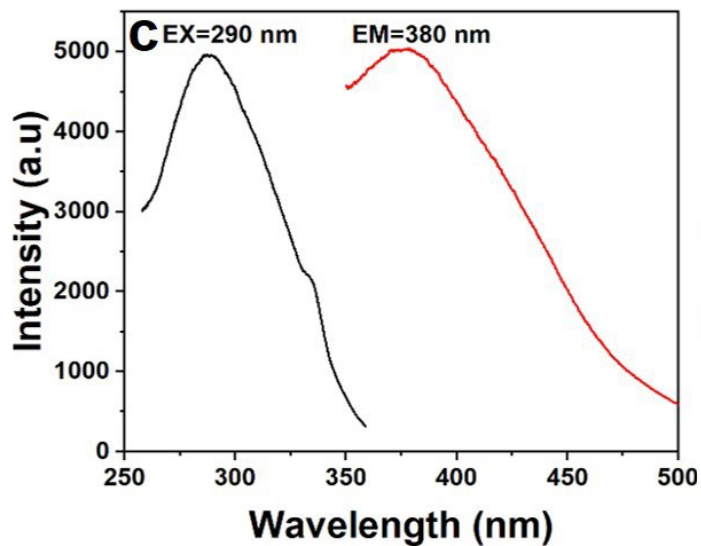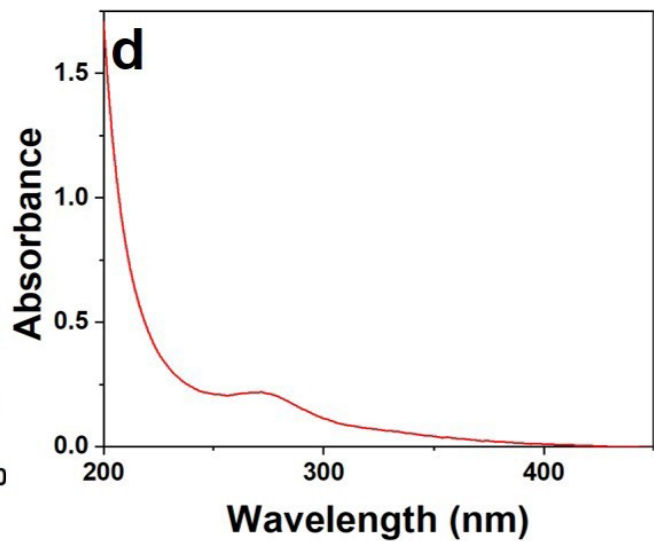

Supplement: d5ra00501a5.pdf [file d5ra00501a5.pdf]

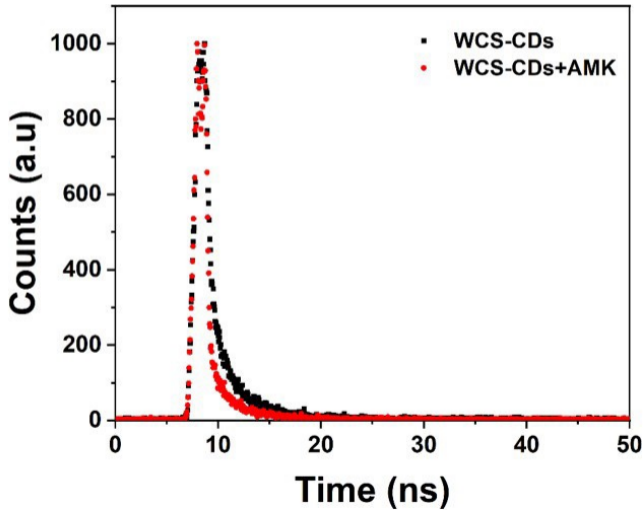

Supplement: d5ra00501a6.pdf [file d5ra00501a6.pdf]
